# Supplementary material for: Polymorphic layered copper phosphonates: exfoliation and proton conductivity studies
Source: Royal Society of Chemistry journal article supplement (doi:10.1039/c9dt00970a), 2019-01-01
Supplement: c9dt00970a1.pdf [file c9dt00970a1.pdf]

## **Supplementary materials**

### **Polymorphic layered copper phosphonates: exfoliation and proton conductivity study**

Bei Liu,<sup>†</sup> Jing-Cui Liu,<sup>†</sup> Yang Shen, Jian-Shen Feng, Song-Song Bao,\* and Li-Min Zheng\*

State Key Laboratory of Coordination Chemistry, School of Chemistry and Chemical Engineering, Collaborative Innovation Center of Advanced Microstructures, Nanjing University, Nanjing 210023, P. R. China

\*Corresponding author. E-mail: lmzheng@nju.edu.cn, baososo@nju.edu.cn

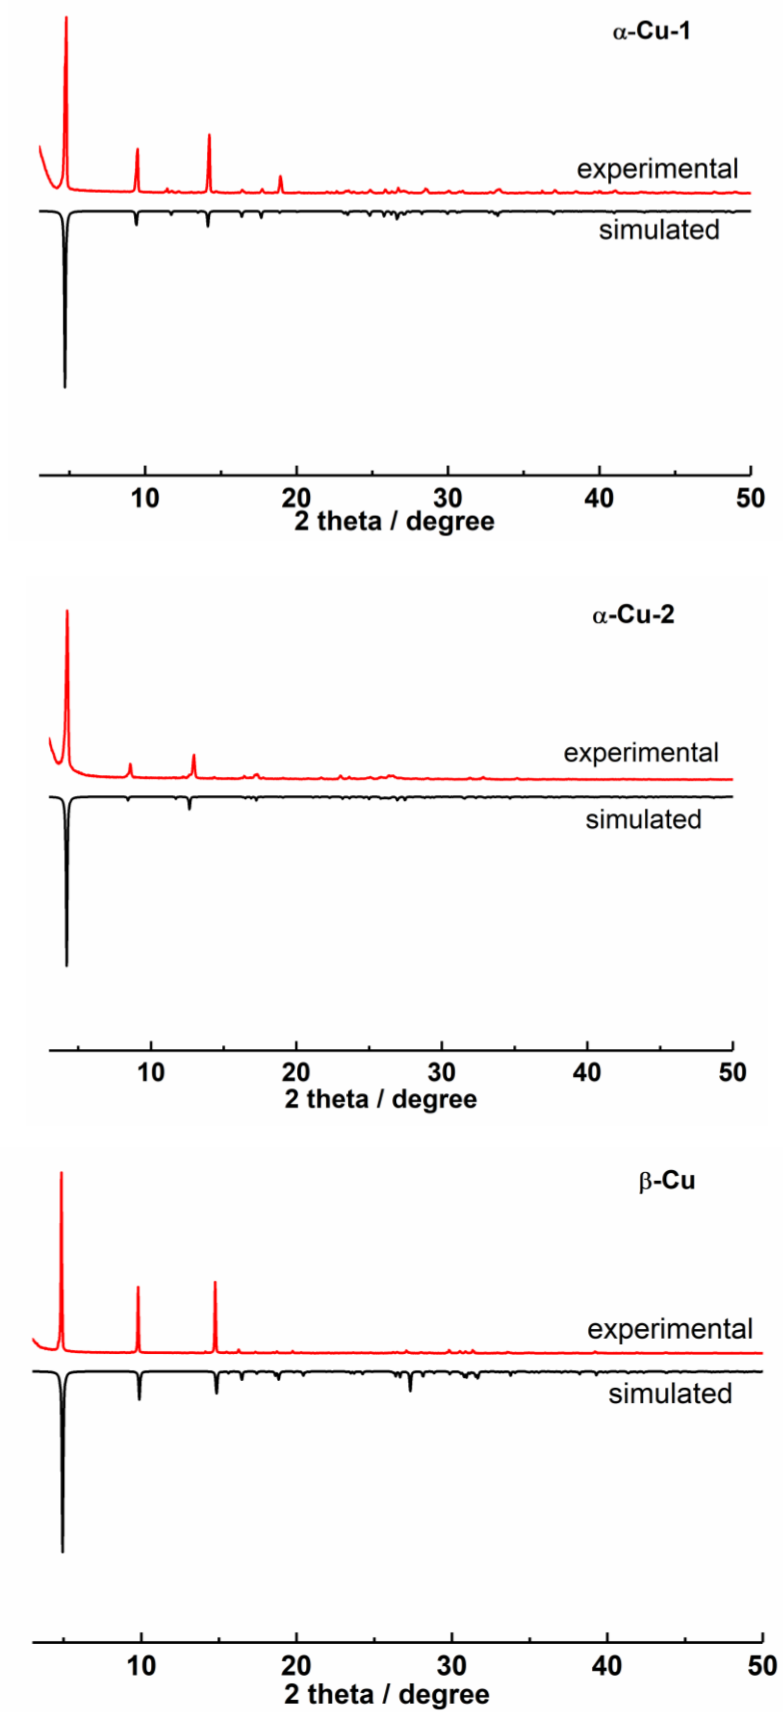

**Fig. S1.** Experimental and simulated XRD patterns of  $\alpha$ -Cu-1,  $\alpha$ -Cu-2 and  $\beta$ -Cu.

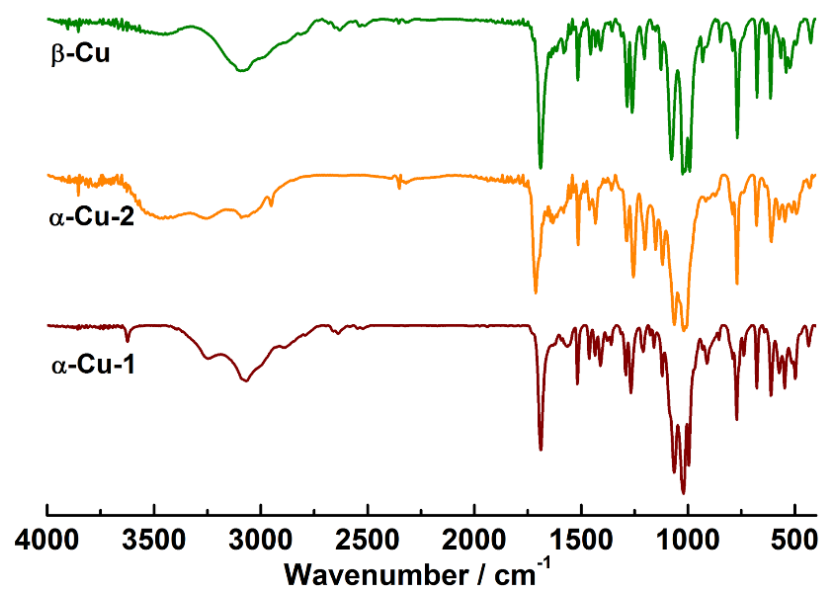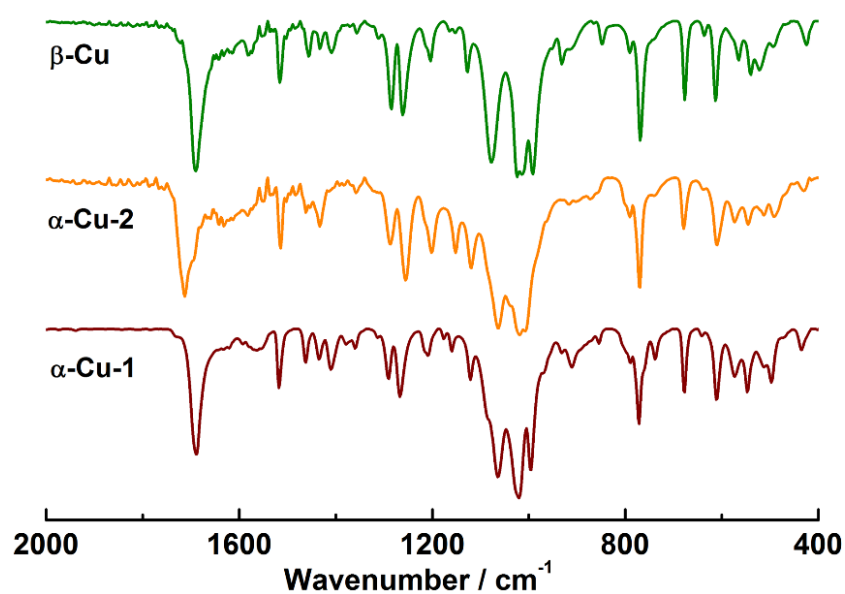

**Fig. S2.** FTIR spectra of compounds  $\alpha$ -Cu-1,  $\alpha$ -Cu-2 and  $\beta$ -Cu. Up: 4000-400 cm<sup>-1</sup>; Bottom: The enlarged view of the range of 2000-400 cm<sup>-1</sup>.

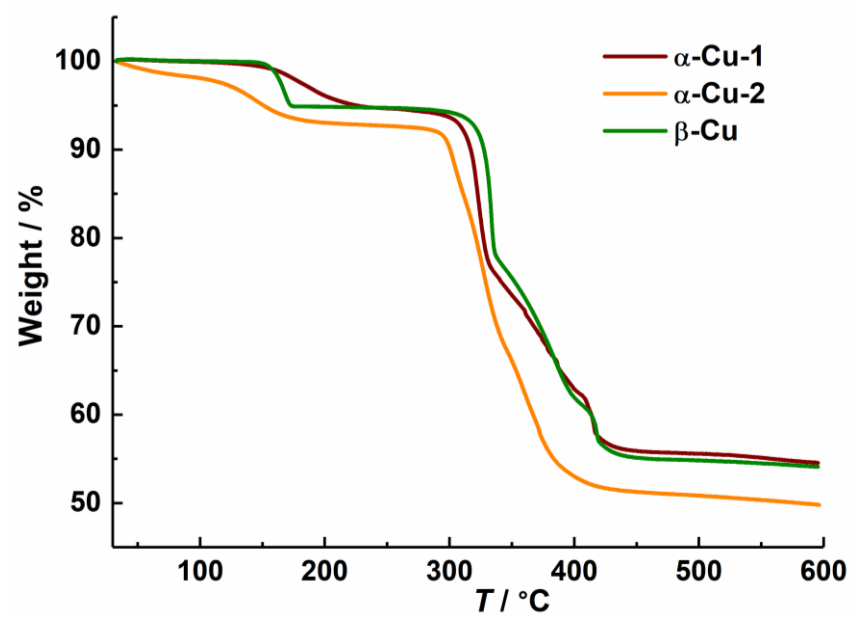

**Fig. S3.** TG curves for compounds  $\alpha$ -Cu-1,  $\alpha$ -Cu-2 and  $\beta$ -Cu

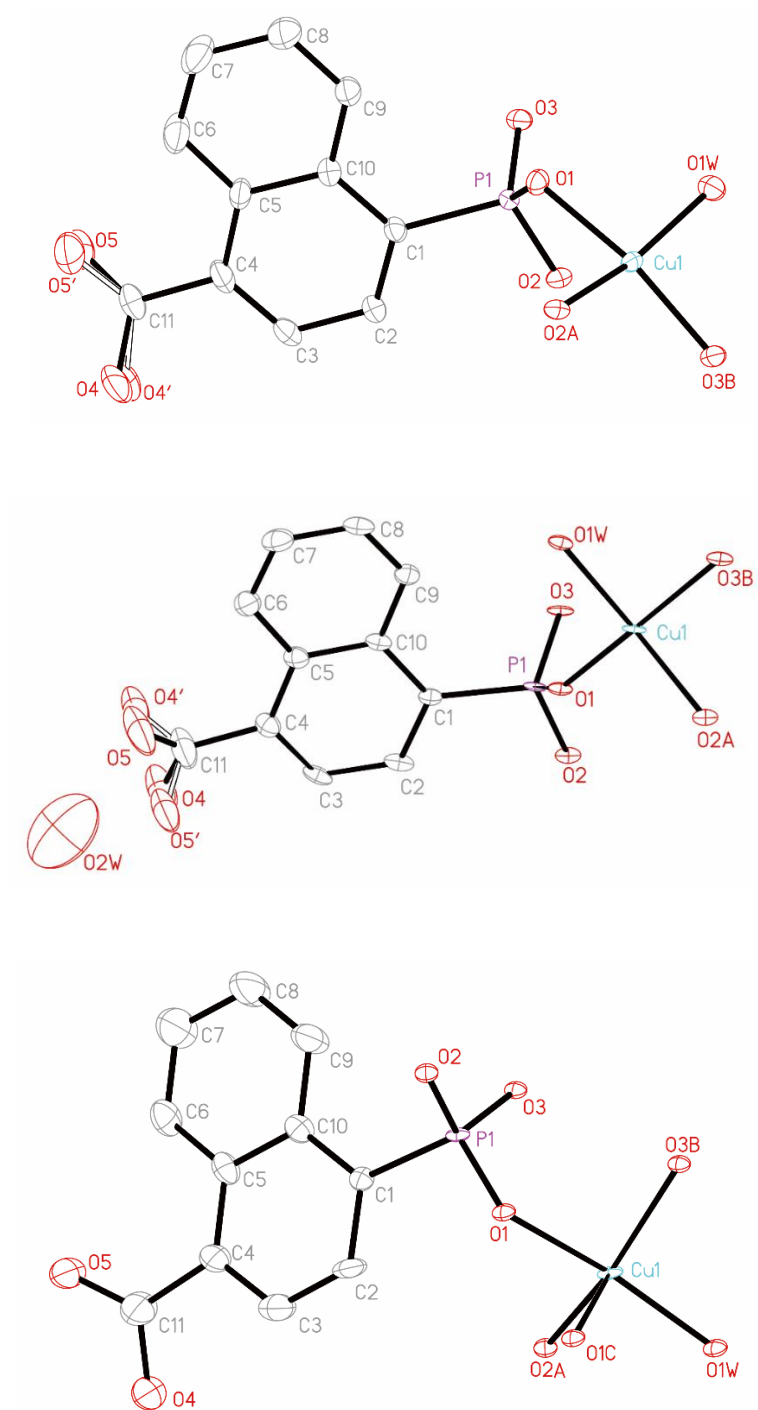

**Fig. S4** Building unit of compounds  $\alpha$ -Cu-1 (top),  $\alpha$ -Cu-2 (middle) and  $\beta$ -Cu (bottom) with atomic labeling scheme (50% probability).

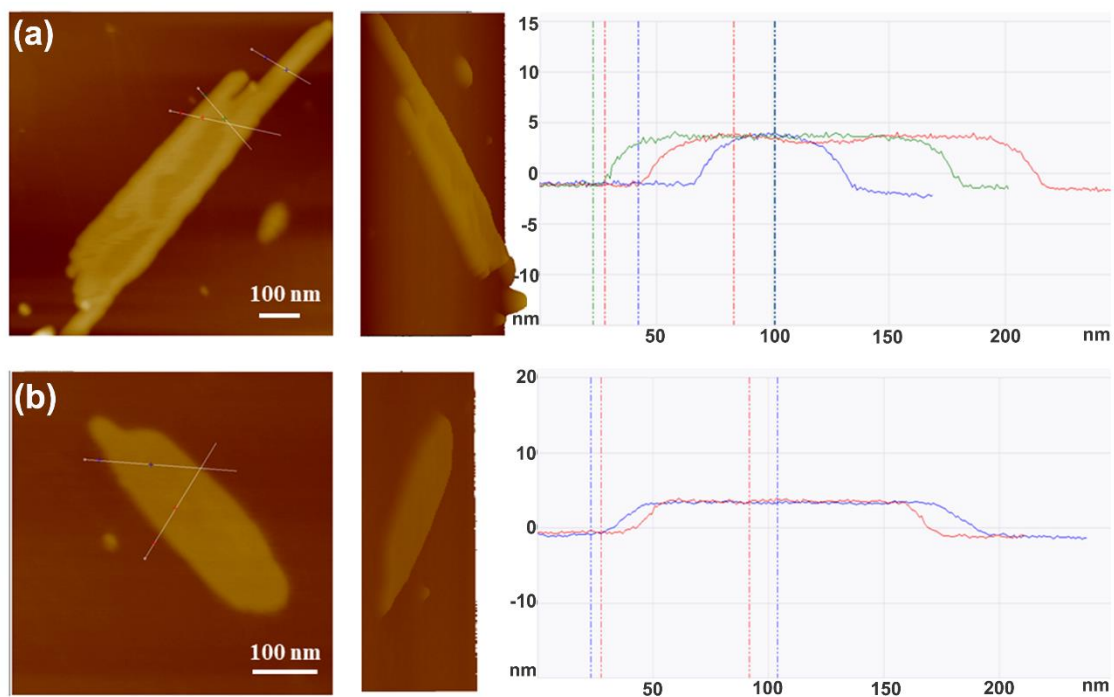

**Fig. S5.** AFM images, 3D visual graphs and the thickness plots of  $\alpha$ -Cu-1 (a) and  $\beta$ -Cu (b) exfoliated in THF.

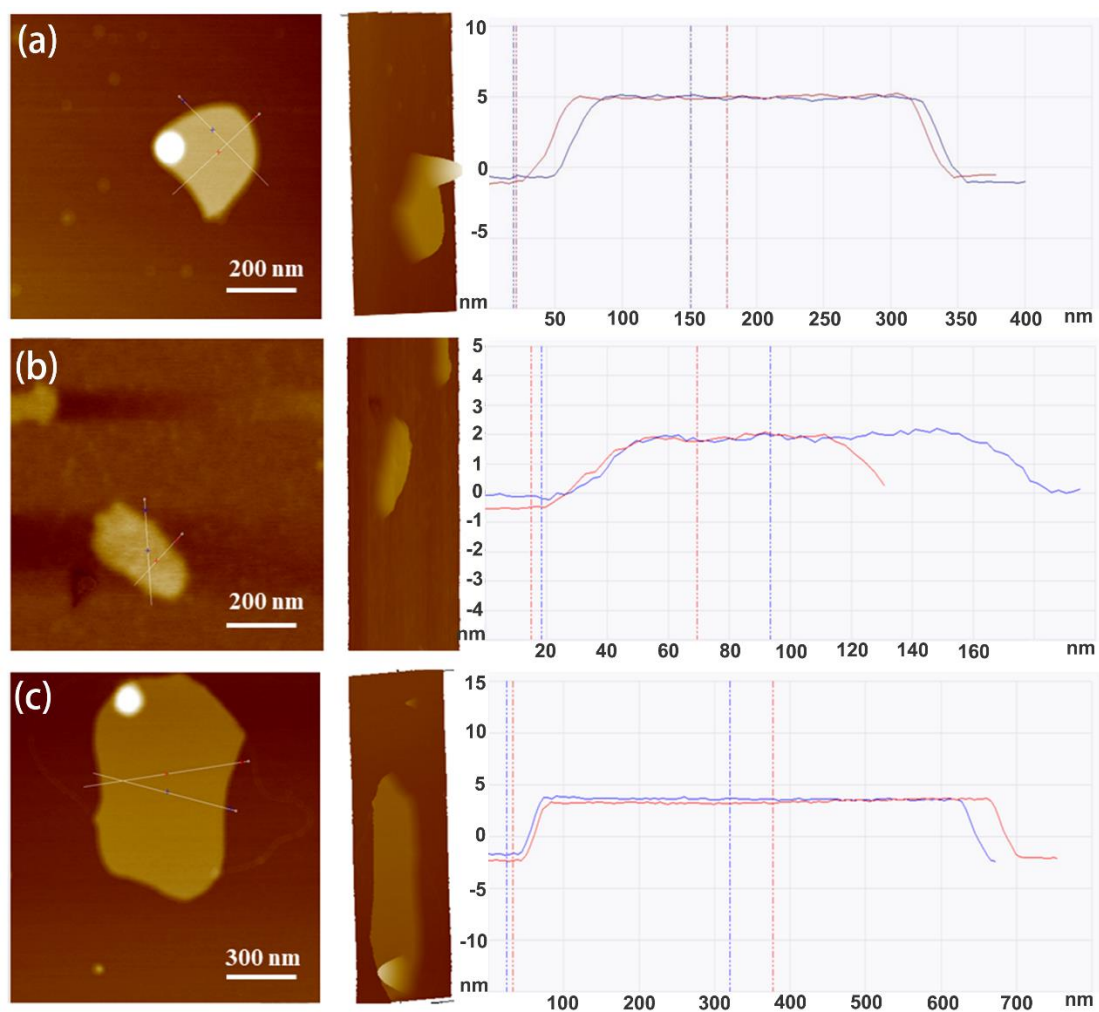

**Fig. S6.** AFM images, 3D visual graphs and the thickness plots of  $\alpha$ -Cu-1 (a),  $\alpha$ -Cu-2 (b) and  $\beta$ -Cu (c) exfoliated in acetone.

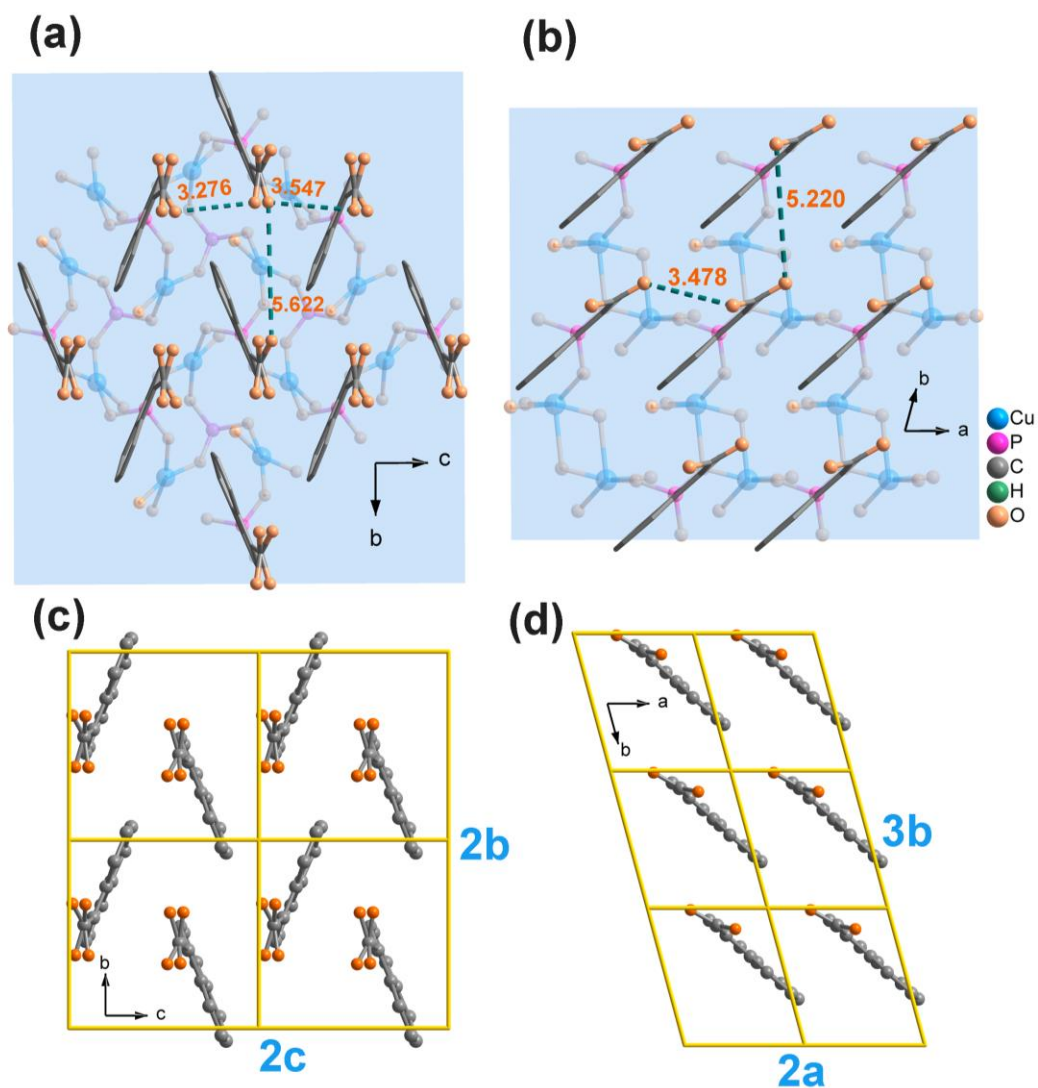

**Fig. S7** The calculation of the packing density of the aryl groups on each side of one layer for  $\alpha$ -Cu-1 (a, c) and  $\beta$ -Cu (b, d). The packing density is 3.3 aryl groups /nm<sup>2</sup> for  $\alpha$ -Cu-1 and 3.2 aryl groups /nm<sup>2</sup> for  $\beta$ -Cu, respectively.



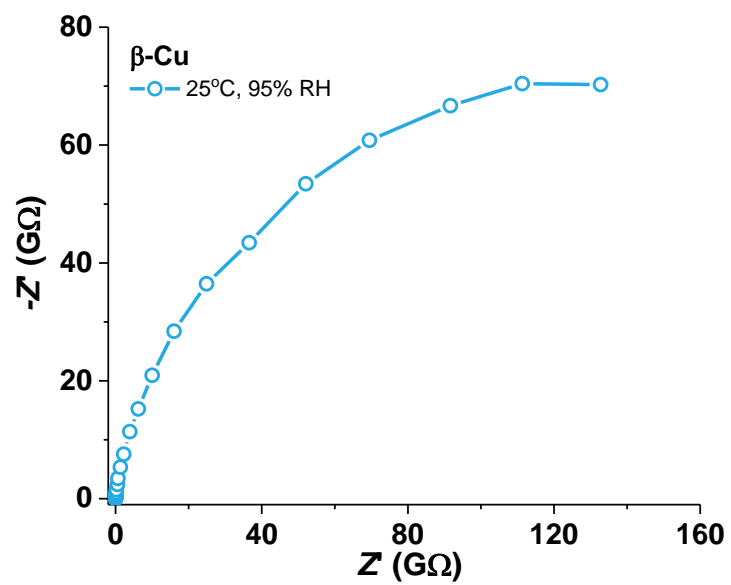

**Fig. S8.** The Nyquist plot for  $\beta$ -Cu at 25 °C, 95%RH.

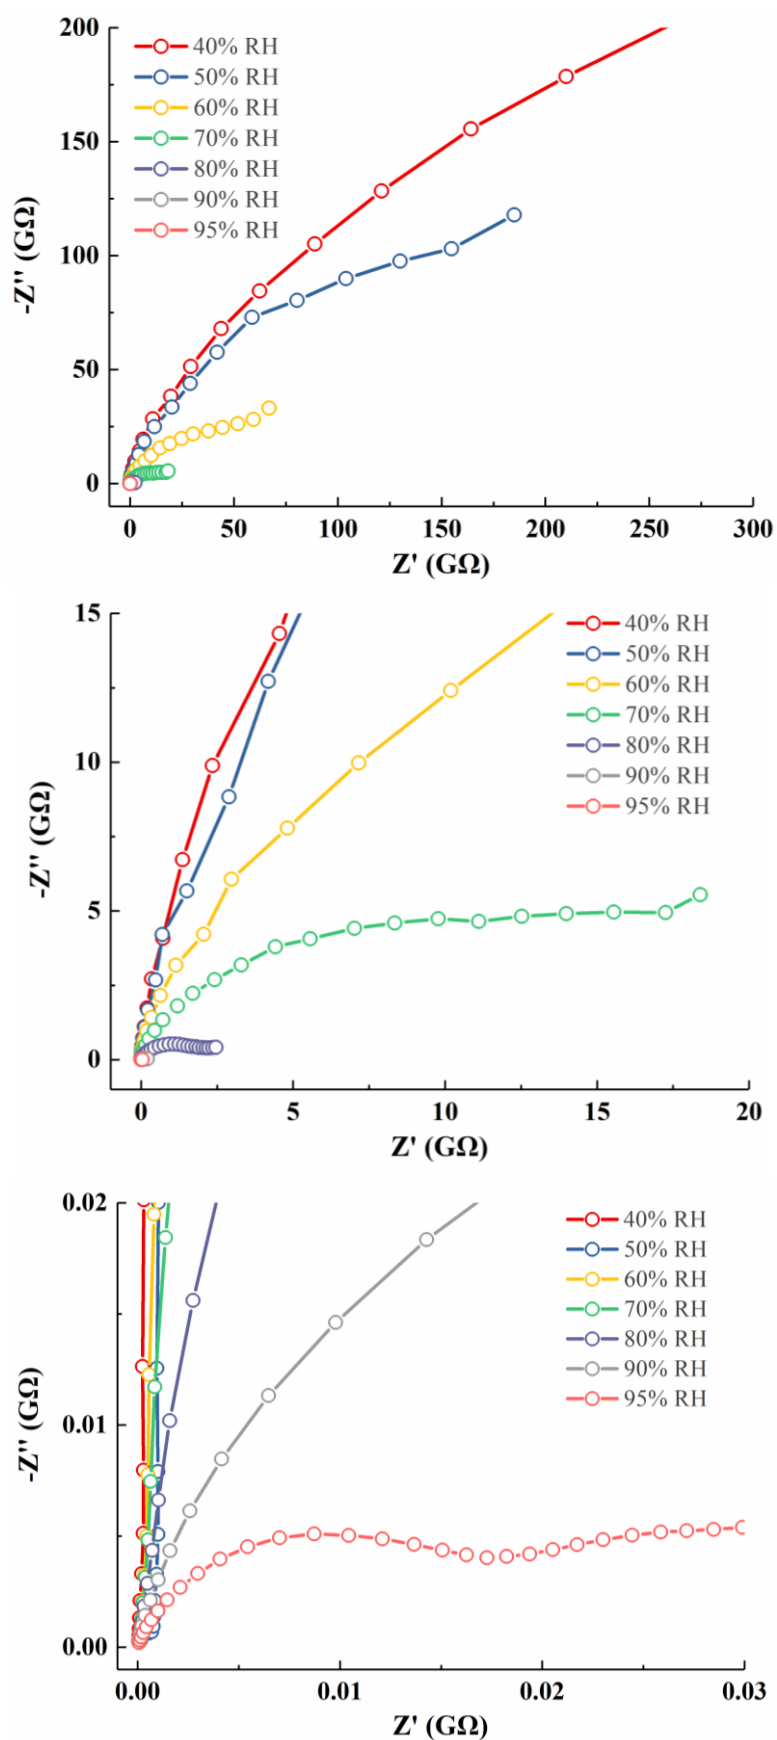

**Fig. S9.** Nyquist plots for the pellet of  $\alpha$ -Cu-1 at 25 °C and various RH. Up: RH increases from 40 to 95%; Middle and Bottom: The enlarged view of graph.

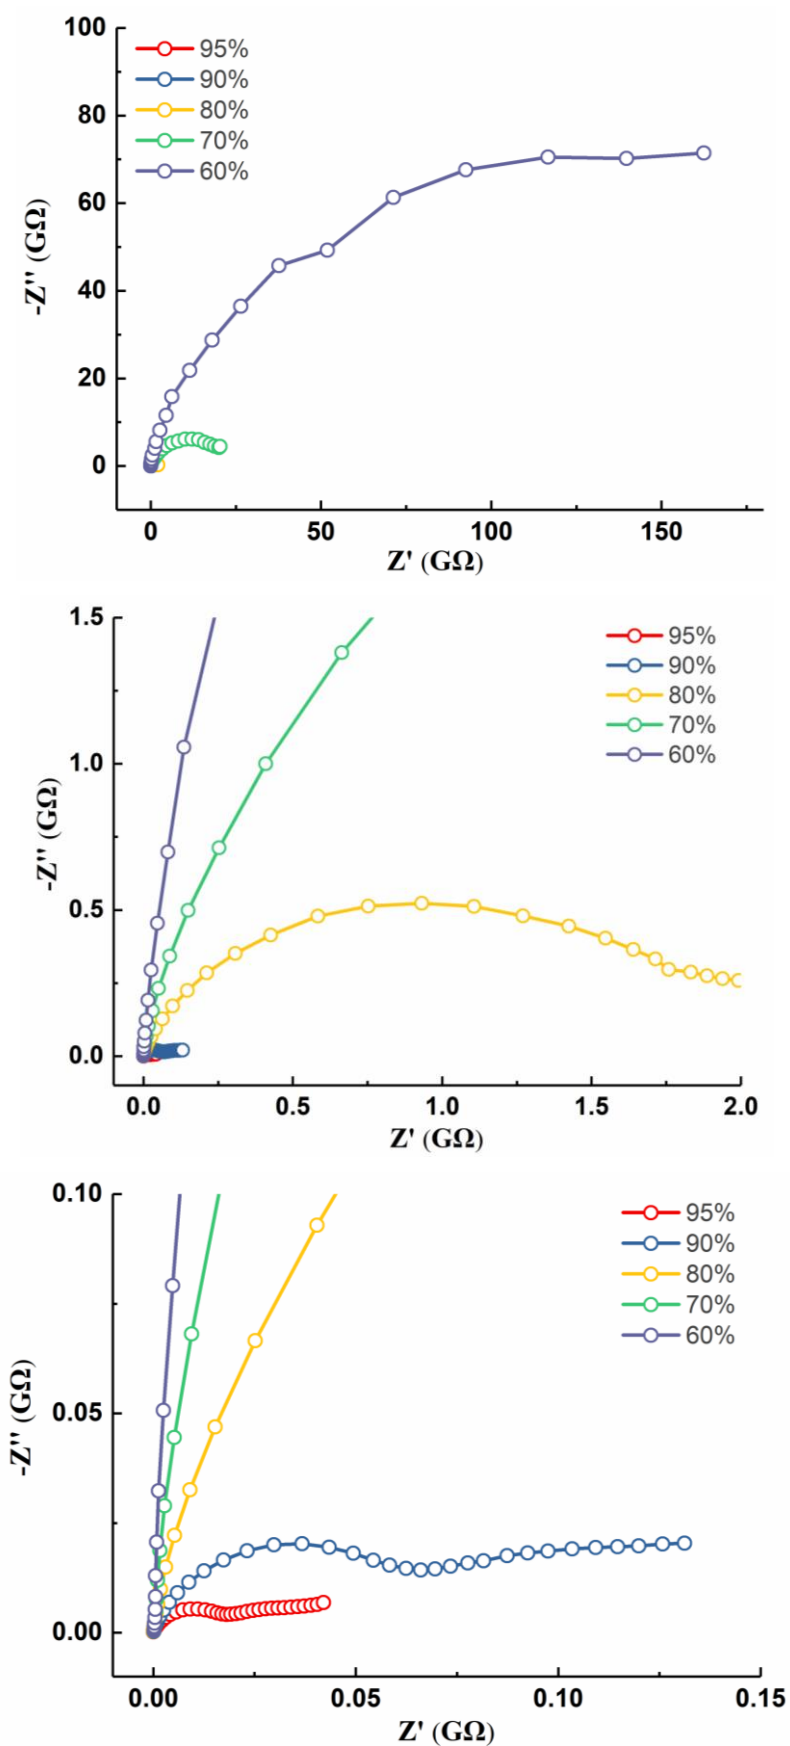

**Fig. S10.** Nyquist plots for the pellet of  $\alpha$ -Cu-1 at 25 °C and various RH. Up: RH decreases from 95 to 60%; Middle and Bottom: The enlarged view of graph.

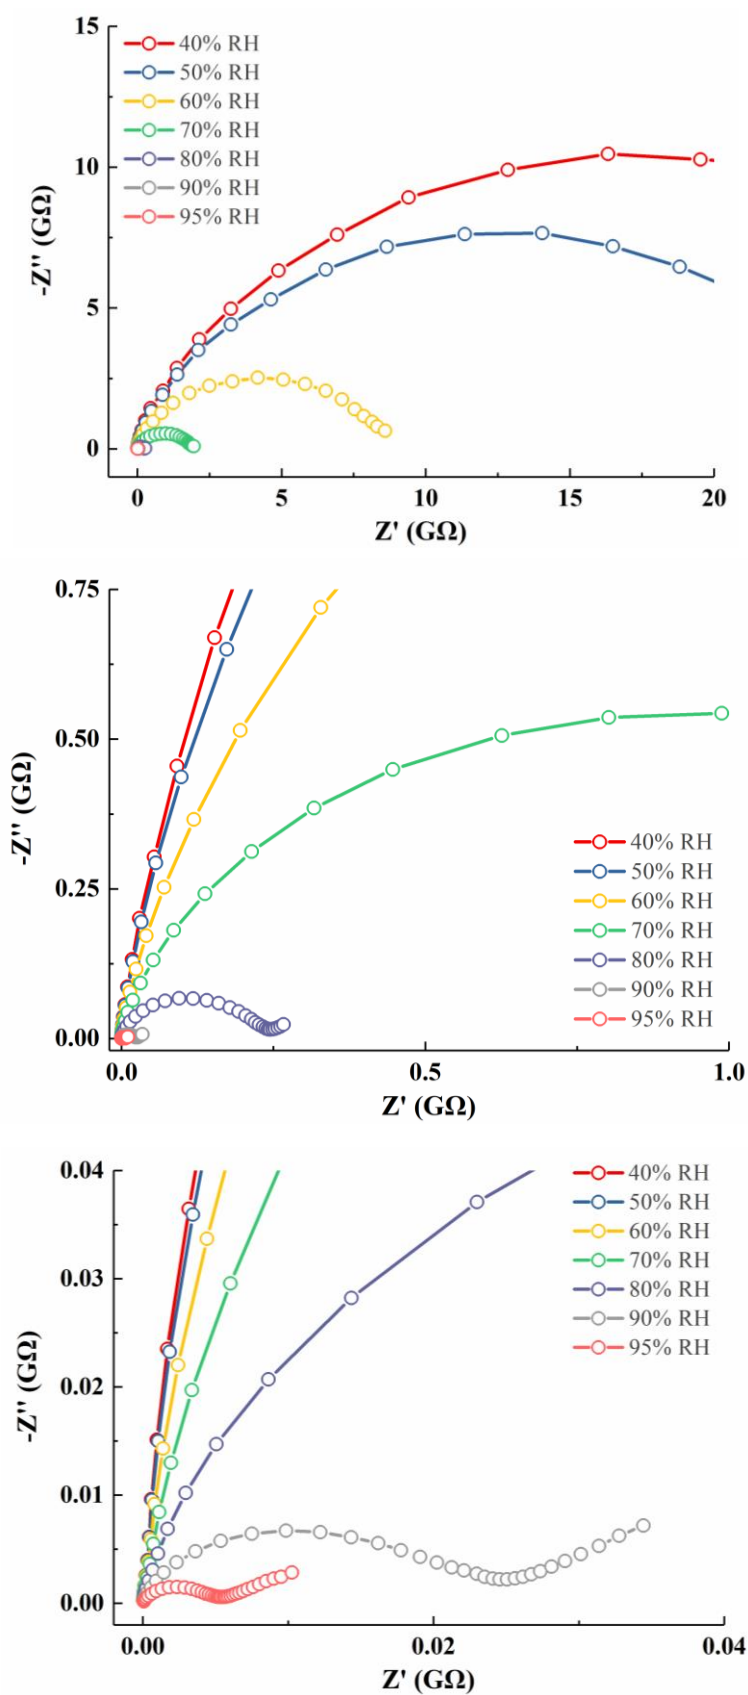

**Fig. S11.** Nyquist plots for the pellet of  $\alpha$ -Cu-2 at 25 °C and various RH. Up: RH increases from 40 to 95%; Middle and Bottom: The enlarged view of graph.

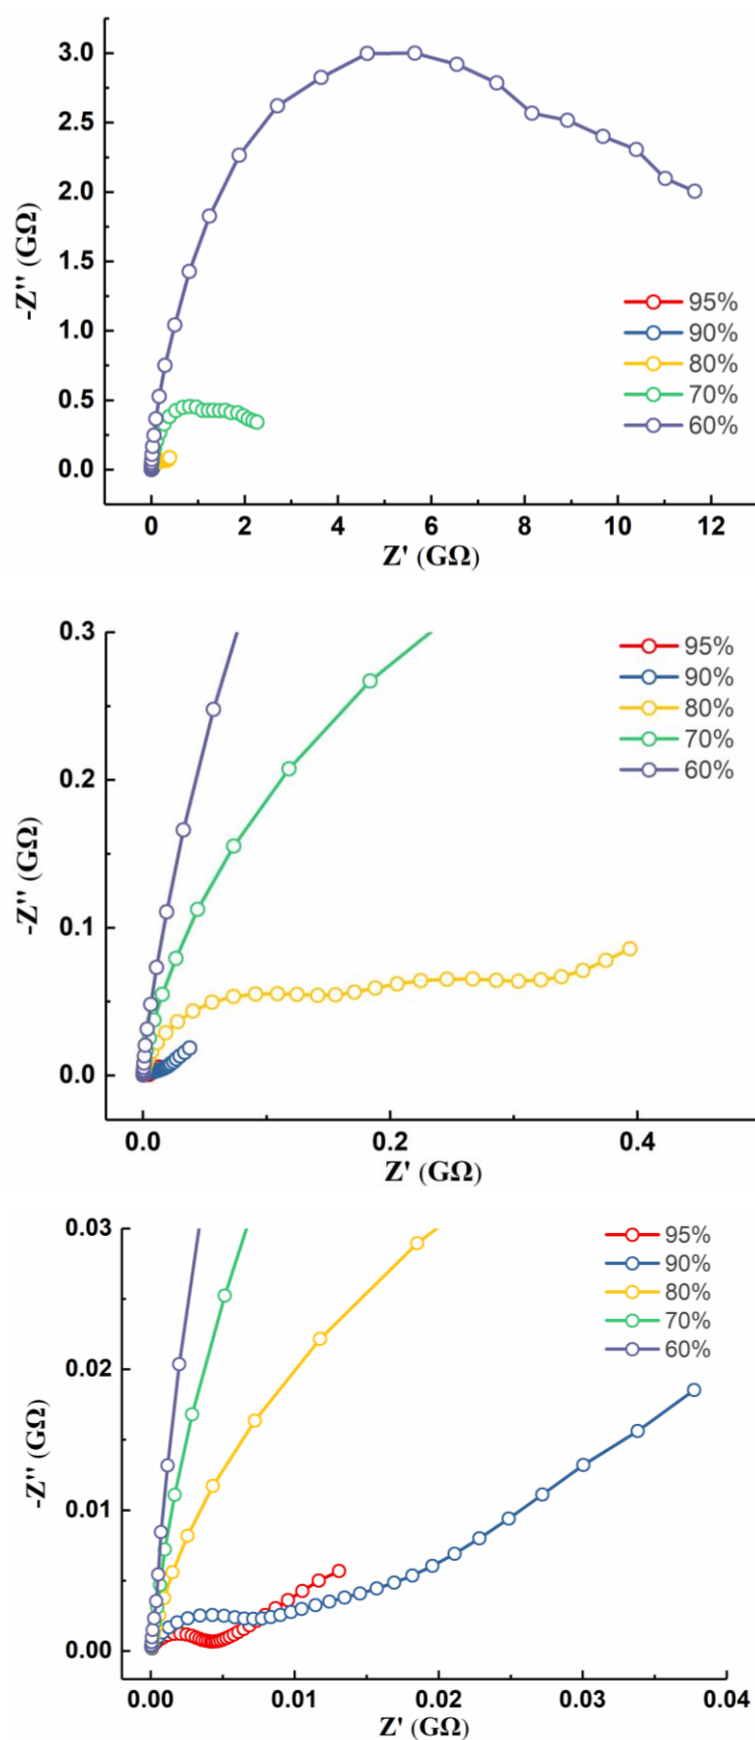

**Fig. S12.** Nyquist plots for the pellet of  $\alpha$ -Cu-2 at 25 °C and various RH. Up: RH decreases from 95 to 60%; Middle and Bottom: The enlarged view of graph.

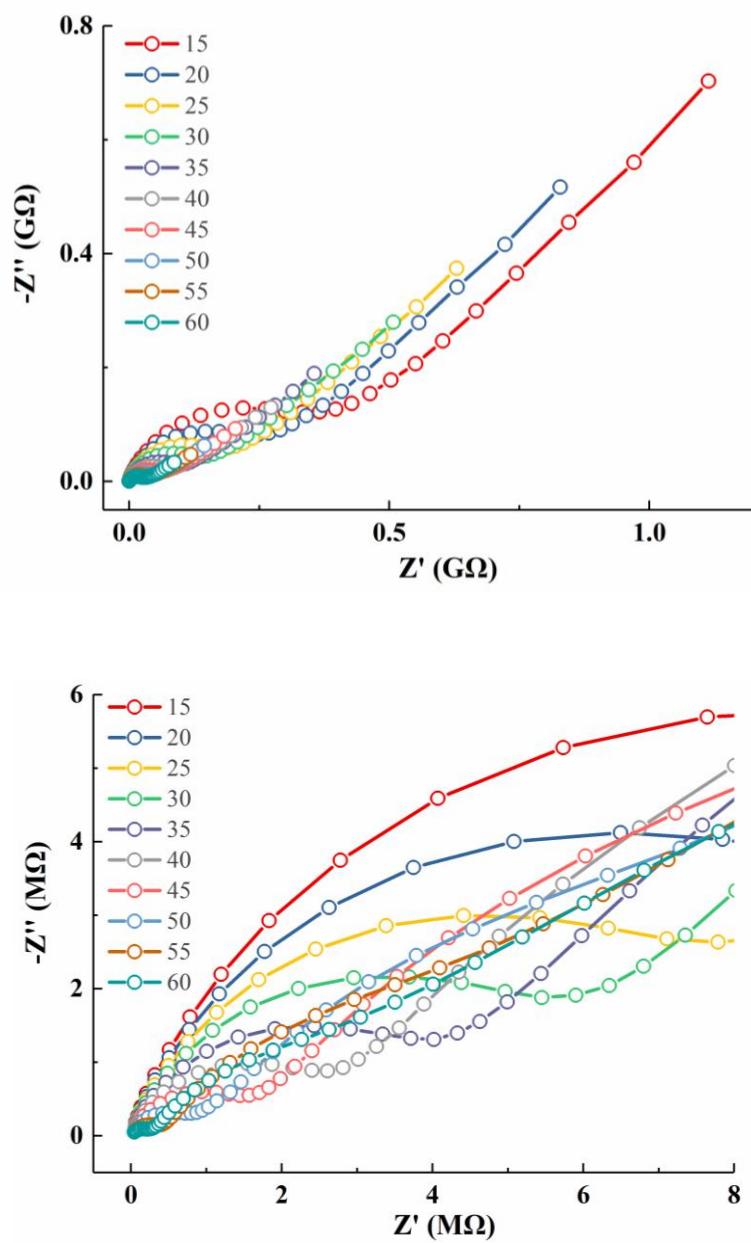

**Fig. S13.** Nyquist plots for  $\alpha$ -Cu-1 at 95% RH and various temperatures. Bottom: The enlarged view of graph.

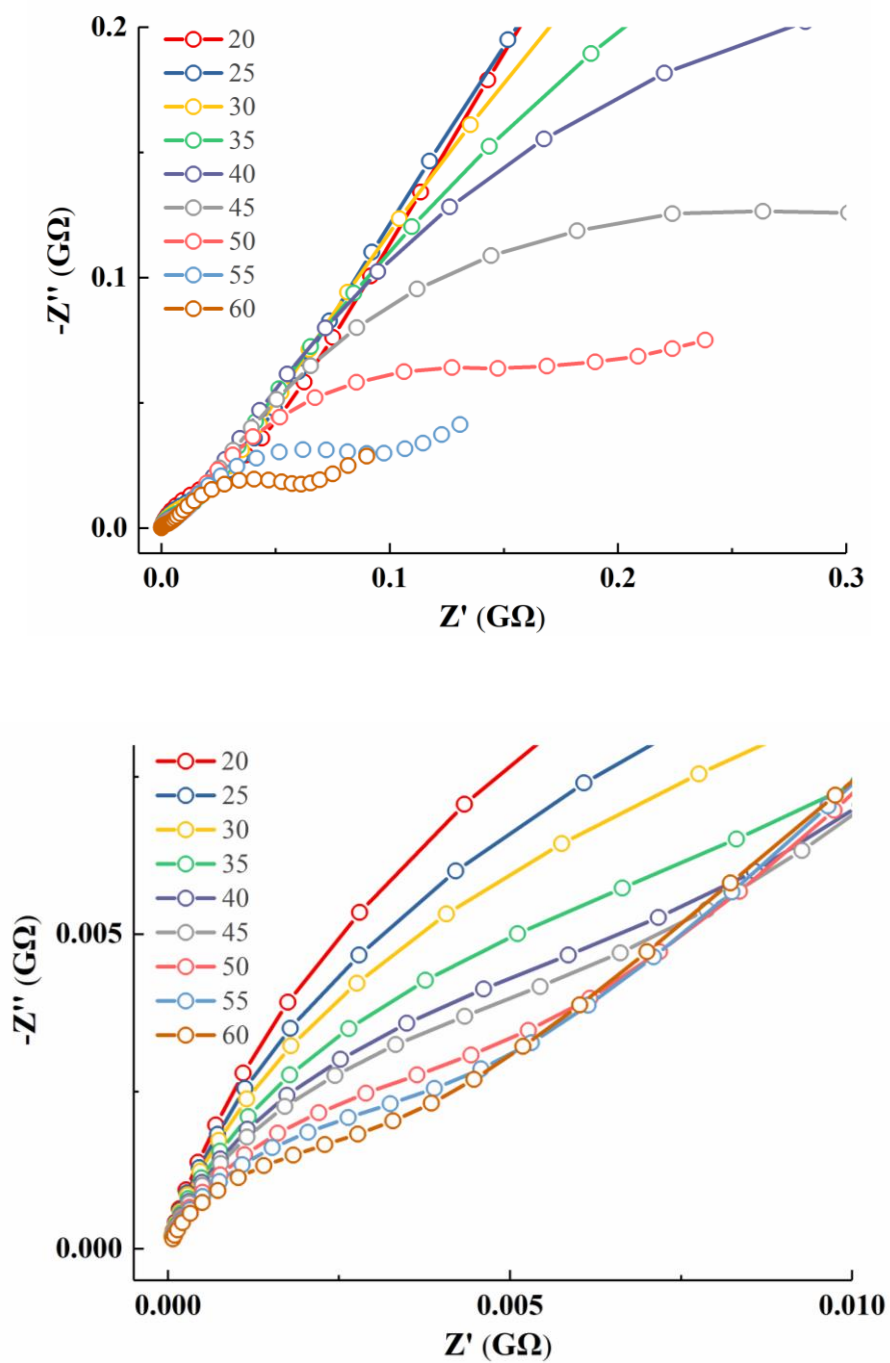

**Fig. S14.** Nyquist plots for  $\alpha$ -Cu-2 at 95% RH and various temperatures. Bottom: The enlarged view of graph.

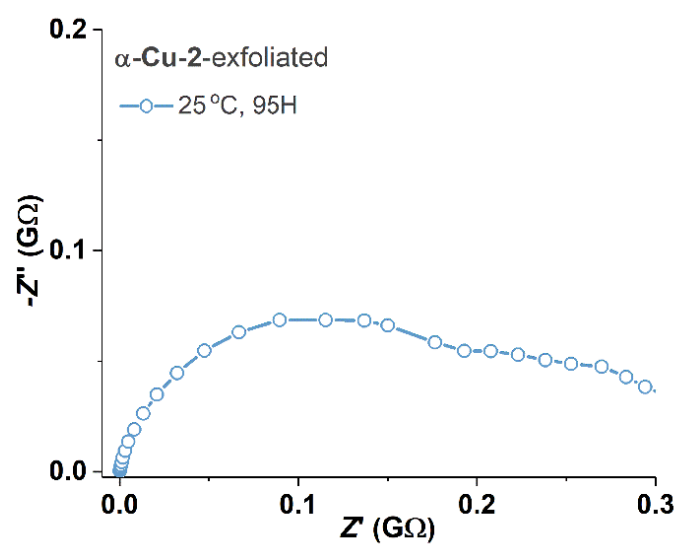

**Fig. S15.** Nyquist plots for  $\alpha$ -Cu-2-exfoliated at 25 °C, 95%RH.
